# Supplementary material for: Early presence of Homo sapiens in Southeast Asia by 86–68 kyr at Tam Pà Ling, Northern Laos
Source: PubMed Central journal article supplement (PMC10264382; doi:10.1038/s41467-023-38715-y), 2023-06-13
Supplement: 41467_2023_38715_MOESM3_ESM.pdf [file 41467_2023_38715_MOESM3_ESM.pdf]

## **Descriptions of Additional Supplementary Information**

**Supplementary Data 1.** Profile 1 magnetic susceptibility (MS) and loss on ignition (LOI) data.

**Supplementary Data 2.** Profile 2 magnetic susceptibility (MS) and loss on ignition (LOI) data.

**Supplementary Data 3.** Procrustes distances (PD) between TPL 1 and 6 frontal shape and all samples in the study (CG = Cau Giat; LC = Lang Cuom; THS = Tam Hang South; THN = Tam Hang North).

**Supplementary Data 4.** Procrustes distances (PD) between TPL 1 maxilla shape and all samples in the study (CG = Cau Giat; LC = Lang Cuom; THS = Tam Hang South; THN = Tam Hang North).

**Supplementary Data 5.** Procrustes distances (PD) between TPL 2 original and reconstructed (Recon) mandible shape and all samples in the study (THS = Tam Hang South).

**Supplementary Data 6.** Procrustes distances of TPL 2 and 3 anterior corpus shape (THS = Tam Hang South).

**Supplementary Data 7.** Fossil and recent human scans used in this study; underlined specimens were casts; M = male, F = female; U = unknown.

**Supplementary Data 8.** Landmarks, curves, and surface semilandmarks used in the analyses. Midline landmarks (i.e., non-bilateral) italicized. <sup>1</sup>One end of curve defined with curve semilandmark and set as a true landmark when sliding.

**Supplementary Code 1.** Script written for OxCal (version 4.2) used for Bayesian modeling of samples from Tam Pà Ling (<https://c14.arch.ox.ac.uk/oxcal.html>); script also available in a usable zipped folder in Supplementary Code 1).
